# Supplementary material for: Cuproptosis-related molecular subtypes direct T cell exhaustion phenotypes and therapeutic strategies for patients with lung adenocarcinoma
Source: Front Pharmacol. 2023 Apr 11;14:1146468. doi: 10.3389/fphar.2023.1146468 (PMC10126426; doi:10.3389/fphar.2023.1146468)
Supplement: Supplementary file 2 [file Table3.XLSX]

## Sheet: geneCluster
Table S3: The information of CuRGs gene clusters
ID	geneCluster
TCGA_TCGA-64-1678	A
TCGA_TCGA-44-8117	A
TCGA_TCGA-44-2662	B
TCGA_TCGA-91-6849	C
TCGA_TCGA-91-A4BD	C
TCGA_TCGA-62-A46S	C
TCGA_TCGA-44-2666	C
TCGA_TCGA-99-8033	B
TCGA_TCGA-55-7574	C
TCGA_TCGA-91-6835	A
TCGA_TCGA-62-8399	A
TCGA_TCGA-MP-A4TI	B
TCGA_TCGA-55-8510	A
TCGA_TCGA-55-8085	C
TCGA_TCGA-55-7995	A
TCGA_TCGA-55-6987	A
TCGA_TCGA-78-7154	B
TCGA_TCGA-49-4494	B
TCGA_TCGA-05-4430	A
TCGA_TCGA-49-AAR3	B
TCGA_TCGA-38-7271	C
TCGA_TCGA-91-6831	A
TCGA_TCGA-55-8616	A
TCGA_TCGA-86-7711	B
TCGA_TCGA-95-7043	A
TCGA_TCGA-75-5147	B
TCGA_TCGA-86-8669	C
TCGA_TCGA-44-A47A	A
TCGA_TCGA-55-7816	A
TCGA_TCGA-44-7671	C
TCGA_TCGA-78-8640	A
TCGA_TCGA-05-4433	A
TCGA_TCGA-55-7570	A
TCGA_TCGA-50-5066	B
TCGA_TCGA-55-8097	C
TCGA_TCGA-91-6840	A
TCGA_TCGA-78-8660	A
TCGA_TCGA-44-A47B	C
TCGA_TCGA-44-5645	C
TCGA_TCGA-73-7498	C
TCGA_TCGA-L9-A7SV	A
TCGA_TCGA-44-6147	C
TCGA_TCGA-73-4675	C
TCGA_TCGA-50-5930	A
TCGA_TCGA-50-5931	B
TCGA_TCGA-62-A46P	C
TCGA_TCGA-50-6595	B
TCGA_TCGA-75-6212	C
TCGA_TCGA-62-8394	B
TCGA_TCGA-MP-A4TD	C
TCGA_TCGA-05-4395	B
TCGA_TCGA-91-6830	A
TCGA_TCGA-44-2657	C
TCGA_TCGA-55-8621	C
TCGA_TCGA-86-8668	C
TCGA_TCGA-05-4425	A
TCGA_TCGA-MP-A5C7	C
TCGA_TCGA-64-1681	C
TCGA_TCGA-95-7947	B
TCGA_TCGA-44-6775	B
TCGA_TCGA-97-A4M6	A
TCGA_TCGA-38-4632	B
TCGA_TCGA-69-8255	A
TCGA_TCGA-L9-A5IP	B
TCGA_TCGA-55-7994	B
TCGA_TCGA-55-7281	A
TCGA_TCGA-91-6847	B
TCGA_TCGA-44-2668	B
TCGA_TCGA-69-7764	C
TCGA_TCGA-55-8089	B
TCGA_TCGA-MN-A4N4	B
TCGA_TCGA-55-1596	B
TCGA_TCGA-83-5908	B
TCGA_TCGA-05-4415	B
TCGA_TCGA-55-8507	C
TCGA_TCGA-55-6982	B
TCGA_TCGA-05-4397	B
TCGA_TCGA-73-4662	C
TCGA_TCGA-97-8552	C
TCGA_TCGA-86-8075	B
TCGA_TCGA-49-4507	B
TCGA_TCGA-49-4510	C
TCGA_TCGA-MP-A4TA	B
TCGA_TCGA-55-6970	A
TCGA_TCGA-49-AARN	A
TCGA_TCGA-78-7145	B
TCGA_TCGA-67-3771	A
TCGA_TCGA-55-5899	A
TCGA_TCGA-97-8174	C
TCGA_TCGA-78-7153	C
TCGA_TCGA-50-6592	B
TCGA_TCGA-95-7039	A
TCGA_TCGA-05-4434	B
TCGA_TCGA-44-6776	C
TCGA_TCGA-05-4384	C
TCGA_TCGA-97-A4M1	C
TCGA_TCGA-86-8281	C
TCGA_TCGA-86-A4D0	C
TCGA_TCGA-67-3773	C
TCGA_TCGA-50-6594	B
TCGA_TCGA-44-4112	A
TCGA_TCGA-55-7724	A
TCGA_TCGA-49-6767	B
TCGA_TCGA-97-7552	C
TCGA_TCGA-91-7771	C
TCGA_TCGA-67-3770	C
TCGA_TCGA-78-8662	A
TCGA_TCGA-55-7914	A
TCGA_TCGA-MP-A4SW	A
TCGA_TCGA-44-3919	A
TCGA_TCGA-69-8253	C
TCGA_TCGA-55-8096	A
TCGA_TCGA-44-3917	C
TCGA_TCGA-05-4426	B
TCGA_TCGA-73-4677	C
TCGA_TCGA-69-7765	A
TCGA_TCGA-50-7109	C
TCGA_TCGA-NJ-A4YP	A
TCGA_TCGA-55-A57B	A
TCGA_TCGA-55-8208	A
TCGA_TCGA-69-7978	B
TCGA_TCGA-49-AAQV	A
TCGA_TCGA-44-7670	A
TCGA_TCGA-55-7727	A
TCGA_TCGA-50-5049	A
TCGA_TCGA-50-5942	C
TCGA_TCGA-55-7910	C
TCGA_TCGA-50-5044	B
TCGA_TCGA-55-7573	C
TCGA_TCGA-05-5425	A
TCGA_TCGA-86-8073	A
TCGA_TCGA-05-5423	C
TCGA_TCGA-78-7152	C
TCGA_TCGA-62-A46R	A
TCGA_TCGA-86-8280	C
TCGA_TCGA-93-A4JO	A
TCGA_TCGA-49-4490	A
TCGA_TCGA-05-5715	A
TCGA_TCGA-38-4631	B
TCGA_TCGA-44-8120	A
TCGA_TCGA-55-7283	C
TCGA_TCGA-53-7624	B
TCGA_TCGA-97-7938	C
TCGA_TCGA-78-7146	B
TCGA_TCGA-49-4501	C
TCGA_TCGA-49-6744	A
TCGA_TCGA-73-4668	A
TCGA_TCGA-55-A48Z	B
TCGA_TCGA-50-5045	A
TCGA_TCGA-55-A491	A
TCGA_TCGA-50-5068	A
TCGA_TCGA-73-4666	B
TCGA_TCGA-55-8087	C
TCGA_TCGA-64-1680	C
TCGA_TCGA-97-A4LX	A
TCGA_TCGA-50-5055	A
TCGA_TCGA-44-6779	B
TCGA_TCGA-55-A494	C
TCGA_TCGA-50-6590	B
TCGA_TCGA-78-7158	C
TCGA_TCGA-MN-A4N5	B
TCGA_TCGA-55-6642	C
TCGA_TCGA-91-A4BC	A
TCGA_TCGA-67-6217	C
TCGA_TCGA-67-6215	C
TCGA_TCGA-86-8358	B
TCGA_TCGA-86-8671	A
TCGA_TCGA-L9-A443	C
TCGA_TCGA-86-8055	B
TCGA_TCGA-95-7562	B
TCGA_TCGA-71-8520	A
TCGA_TCGA-05-4398	B
TCGA_TCGA-J2-A4AG	A
TCGA_TCGA-05-4405	A
TCGA_TCGA-67-3772	C
TCGA_TCGA-35-5375	B
TCGA_TCGA-44-5644	A
TCGA_TCGA-86-A4P8	C
TCGA_TCGA-O1-A52J	C
TCGA_TCGA-78-7536	A
TCGA_TCGA-55-6981	B
TCGA_TCGA-78-7156	C
TCGA_TCGA-55-8514	C
TCGA_TCGA-55-6712	B
TCGA_TCGA-NJ-A55R	C
TCGA_TCGA-95-A4VK	A
TCGA_TCGA-75-5146	C
TCGA_TCGA-86-8056	A
TCGA_TCGA-55-8090	A
TCGA_TCGA-MP-A4TH	C
TCGA_TCGA-44-6145	A
TCGA_TCGA-55-A48Y	A
TCGA_TCGA-78-7150	B
TCGA_TCGA-55-8620	A
TCGA_TCGA-55-7907	A
TCGA_TCGA-44-3918	A
TCGA_TCGA-49-AARQ	A
TCGA_TCGA-64-5775	B
TCGA_TCGA-MP-A4T6	C
TCGA_TCGA-05-4403	C
TCGA_TCGA-91-8497	C
TCGA_TCGA-62-A472	B
TCGA_TCGA-67-4679	C
TCGA_TCGA-44-A479	A
TCGA_TCGA-78-7167	C
TCGA_TCGA-55-8206	C
TCGA_TCGA-55-8091	A
TCGA_TCGA-78-7535	A
TCGA_TCGA-99-8028	A
TCGA_TCGA-4B-A93V	C
TCGA_TCGA-55-7911	A
TCGA_TCGA-78-7147	A
TCGA_TCGA-55-A4DG	C
TCGA_TCGA-97-A4M0	C
TCGA_TCGA-05-4390	C
TCGA_TCGA-38-4627	A
TCGA_TCGA-50-5933	B
TCGA_TCGA-44-7659	C
TCGA_TCGA-73-4670	A
TCGA_TCGA-44-7662	B
TCGA_TCGA-62-A46O	B
TCGA_TCGA-05-4424	A
TCGA_TCGA-86-8074	B
TCGA_TCGA-49-4505	A
TCGA_TCGA-97-7554	A
TCGA_TCGA-86-7714	A
TCGA_TCGA-55-8506	A
TCGA_TCGA-55-6980	A
TCGA_TCGA-55-7284	C
TCGA_TCGA-NJ-A4YQ	A
TCGA_TCGA-38-4629	B
TCGA_TCGA-05-4382	A
TCGA_TCGA-44-A4SS	B
TCGA_TCGA-78-7161	C
TCGA_TCGA-55-6968	B
TCGA_TCGA-38-4625	B
TCGA_TCGA-86-8673	A
TCGA_TCGA-95-8494	B
TCGA_TCGA-53-7626	C
TCGA_TCGA-49-4514	C
TCGA_TCGA-86-7713	C
TCGA_TCGA-55-6975	B
TCGA_TCGA-49-6761	B
TCGA_TCGA-97-8171	C
TCGA_TCGA-86-A456	C
TCGA_TCGA-55-8505	A
TCGA_TCGA-99-7458	A
TCGA_TCGA-55-8204	B
TCGA_TCGA-44-3396	B
TCGA_TCGA-86-A4JF	A
TCGA_TCGA-50-5072	B
TCGA_TCGA-86-8674	C
TCGA_TCGA-35-4123	B
TCGA_TCGA-73-7499	B
TCGA_TCGA-44-A4SU	A
TCGA_TCGA-55-8614	A
TCGA_TCGA-64-1677	A
TCGA_TCGA-38-4626	C
TCGA_TCGA-91-6828	C
TCGA_TCGA-MP-A4TE	C
TCGA_TCGA-78-7633	C
TCGA_TCGA-55-8511	A
TCGA_TCGA-73-4659	C
TCGA_TCGA-35-4122	B
TCGA_TCGA-78-7149	C
TCGA_TCGA-78-8655	A
TCGA_TCGA-55-8301	A
TCGA_TCGA-55-8094	C
TCGA_TCGA-78-7148	C
TCGA_TCGA-62-A46V	A
TCGA_TCGA-49-6745	B
TCGA_TCGA-55-7815	C
TCGA_TCGA-55-6543	A
TCGA_TCGA-38-6178	A
TCGA_TCGA-44-3398	A
TCGA_TCGA-J2-A4AE	C
TCGA_TCGA-69-7974	A
TCGA_TCGA-99-8032	C
TCGA_TCGA-93-7347	C
TCGA_TCGA-50-5939	B
TCGA_TCGA-50-5941	A
TCGA_TCGA-78-7163	A
TCGA_TCGA-MP-A4SY	B
TCGA_TCGA-44-7669	A
TCGA_TCGA-55-6986	A
TCGA_TCGA-55-6971	C
TCGA_TCGA-50-6597	C
TCGA_TCGA-49-4488	A
TCGA_TCGA-55-8203	C
TCGA_TCGA-93-A4JP	C
TCGA_TCGA-62-A46Y	A
TCGA_TCGA-L4-A4E6	C
TCGA_TCGA-MP-A4TK	A
TCGA_TCGA-44-7660	B
TCGA_TCGA-44-7667	A
TCGA_TCGA-MP-A4TC	B
TCGA_TCGA-38-4630	B
TCGA_TCGA-05-4396	C
TCGA_TCGA-MP-A4T7	C
TCGA_TCGA-44-6777	A
TCGA_TCGA-78-7155	B
TCGA_TCGA-62-8398	A
TCGA_TCGA-78-7540	C
TCGA_TCGA-62-8402	A
TCGA_TCGA-86-6562	A
TCGA_TCGA-J2-8192	A
TCGA_TCGA-91-8499	B
TCGA_TCGA-50-6673	A
TCGA_TCGA-55-A48X	A
TCGA_TCGA-49-4486	C
TCGA_TCGA-69-7760	A
TCGA_TCGA-05-4249	C
TCGA_TCGA-49-AAR0	C
TCGA_TCGA-MP-A4T8	A
TCGA_TCGA-49-AARR	C
TCGA_TCGA-50-6591	B
TCGA_TCGA-55-6972	C
TCGA_TCGA-91-6848	B
TCGA_TCGA-44-8119	A
TCGA_TCGA-97-8175	B
TCGA_TCGA-78-7539	C
TCGA_TCGA-L9-A50W	C
TCGA_TCGA-86-8672	B
TCGA_TCGA-86-7955	B
TCGA_TCGA-50-5051	C
TCGA_TCGA-NJ-A7XG	C
TCGA_TCGA-75-5125	B
TCGA_TCGA-05-4418	B
TCGA_TCGA-05-4402	A
TCGA_TCGA-S2-AA1A	C
TCGA_TCGA-62-8395	C
TCGA_TCGA-55-7726	B
TCGA_TCGA-75-6206	C
TCGA_TCGA-97-8177	C
TCGA_TCGA-44-2656	A
TCGA_TCGA-50-8457	C
TCGA_TCGA-91-6836	B
TCGA_TCGA-78-8648	A
TCGA_TCGA-86-8585	A
TCGA_TCGA-97-A4M3	C
TCGA_TCGA-97-7553	C
TCGA_TCGA-55-A490	A
TCGA_TCGA-73-4658	A
TCGA_TCGA-86-6851	A
TCGA_TCGA-78-7162	C
TCGA_TCGA-05-4432	C
TCGA_TCGA-78-7537	C
TCGA_TCGA-J2-A4AD	B
TCGA_TCGA-44-7661	B
TCGA_TCGA-93-7348	C
TCGA_TCGA-L9-A444	A
TCGA_TCGA-49-AAR9	B
TCGA_TCGA-49-AARO	B
TCGA_TCGA-55-A492	C
TCGA_TCGA-55-8299	A
TCGA_TCGA-50-5932	C
TCGA_TCGA-78-7220	A
TCGA_TCGA-86-8279	A
TCGA_TCGA-62-A471	B
TCGA_TCGA-55-6978	B
TCGA_TCGA-49-4506	A
TCGA_TCGA-53-7813	C
TCGA_TCGA-55-7576	A
TCGA_TCGA-05-5428	B
TCGA_TCGA-97-A4M7	A
TCGA_TCGA-55-7227	A
TCGA_TCGA-MP-A4T4	B
TCGA_TCGA-78-7166	A
TCGA_TCGA-55-7903	A
TCGA_TCGA-80-5611	B
TCGA_TCGA-93-8067	A
TCGA_TCGA-95-7948	A
TCGA_TCGA-55-1594	A
TCGA_TCGA-05-4410	A
TCGA_TCGA-75-7027	A
TCGA_TCGA-64-1679	B
TCGA_TCGA-44-2659	A
TCGA_TCGA-55-A4DF	B
TCGA_TCGA-64-5815	A
TCGA_TCGA-49-4512	C
TCGA_TCGA-86-A4P7	C
TCGA_TCGA-86-7953	B
TCGA_TCGA-86-7954	A
TCGA_TCGA-86-7701	A
TCGA_TCGA-64-5781	B
TCGA_TCGA-MN-A4N1	A
TCGA_TCGA-99-AA5R	C
TCGA_TCGA-55-8512	C
TCGA_TCGA-55-8205	B
TCGA_TCGA-64-5778	A
TCGA_TCGA-35-3615	C
TCGA_TCGA-95-7567	A
TCGA_TCGA-50-5946	A
TCGA_TCGA-05-4427	B
TCGA_TCGA-78-7143	B
TCGA_TCGA-69-8254	C
TCGA_TCGA-55-6979	B
TCGA_TCGA-05-4417	C
TCGA_TCGA-49-AARE	A
TCGA_TCGA-64-5774	A
TCGA_TCGA-55-1592	A
TCGA_TCGA-49-AAR4	B
TCGA_TCGA-78-7160	A
TCGA_TCGA-69-A59K	B
TCGA_TCGA-05-5429	A
TCGA_TCGA-44-2655	C
TCGA_TCGA-55-8092	A
TCGA_TCGA-MP-A4T9	A
TCGA_TCGA-86-8359	A
TCGA_TCGA-55-A493	B
TCGA_TCGA-05-5420	A
TCGA_TCGA-78-7159	C
TCGA_TCGA-44-2661	C
TCGA_TCGA-50-5935	C
TCGA_TCGA-44-2665	B
TCGA_TCGA-97-7937	A
TCGA_TCGA-38-4628	A
TCGA_TCGA-73-4676	B
TCGA_TCGA-L9-A8F4	A
TCGA_TCGA-44-A47G	A
TCGA_TCGA-97-7547	C
TCGA_TCGA-05-4422	C
TCGA_TCGA-97-A4M2	C
TCGA_TCGA-J2-8194	C
TCGA_TCGA-95-A4VN	B
TCGA_TCGA-80-5608	C
TCGA_TCGA-49-6743	B
TCGA_TCGA-78-7542	B
TCGA_TCGA-55-8615	C
TCGA_TCGA-05-4389	A
TCGA_TCGA-91-6829	B
TCGA_TCGA-91-8496	C
TCGA_TCGA-49-4487	A
TCGA_TCGA-NJ-A4YG	C
TCGA_TCGA-44-6774	A
TCGA_TCGA-50-6593	A
TCGA_TCGA-44-5643	B
TCGA_TCGA-50-8460	C
TCGA_TCGA-75-6214	B
TCGA_TCGA-05-4244	A
TCGA_TCGA-71-6725	A
TCGA_TCGA-L9-A743	A
TCGA_TCGA-55-6984	A
TCGA_TCGA-05-4250	B
TCGA_TCGA-55-7913	A
TCGA_TCGA-69-7980	A
TCGA_TCGA-95-7944	B
TCGA_TCGA-NJ-A4YF	C
TCGA_TCGA-67-3774	C
TCGA_TCGA-55-6985	A
TCGA_TCGA-55-7725	C
TCGA_TCGA-L4-A4E5	A
TCGA_TCGA-62-8397	C
TCGA_TCGA-44-7672	A
TCGA_TCGA-73-A9RS	A
TCGA_TCGA-67-6216	A
TCGA_TCGA-86-8076	C
TCGA_TCGA-44-6778	C
TCGA_TCGA-69-7973	C
TCGA_TCGA-MP-A4TF	B
TCGA_TCGA-05-4420	A
TCGA_TCGA-69-7763	C
TCGA_TCGA-97-A4M5	C
TCGA_TCGA-55-8302	B
TCGA_TCGA-75-7025	C
TCGA_TCGA-64-1676	B
TCGA_TCGA-MP-A4SV	A
TCGA_TCGA-99-8025	A
GSE30219_GSM748053	C
GSE30219_GSM748054	B
GSE30219_GSM748055	A
GSE30219_GSM748057	C
GSE30219_GSM748058	C
GSE30219_GSM748064	A
GSE30219_GSM748068	B
GSE30219_GSM748071	C
GSE30219_GSM748075	B
GSE30219_GSM748077	A
GSE30219_GSM748078	C
GSE30219_GSM748079	A
GSE30219_GSM748080	A
GSE30219_GSM748081	A
GSE30219_GSM748083	C
GSE30219_GSM748085	C
GSE30219_GSM748086	C
GSE30219_GSM748087	C
GSE30219_GSM748089	B
GSE30219_GSM748090	C
GSE30219_GSM748091	B
GSE30219_GSM748092	A
GSE30219_GSM748094	A
GSE30219_GSM748100	B
GSE30219_GSM748101	A
GSE30219_GSM748102	A
GSE30219_GSM748103	C
GSE30219_GSM748104	C
GSE30219_GSM748108	A
GSE30219_GSM748111	B
GSE30219_GSM748113	B
GSE30219_GSM748116	B
GSE30219_GSM748121	C
GSE30219_GSM748122	A
GSE30219_GSM748123	A
GSE30219_GSM748124	C
GSE30219_GSM748125	A
GSE30219_GSM748126	C
GSE30219_GSM748127	B
GSE30219_GSM748128	C
GSE30219_GSM748130	C
GSE30219_GSM748131	A
GSE30219_GSM748134	A
GSE30219_GSM748135	C
GSE30219_GSM748137	C
GSE30219_GSM748138	B
GSE30219_GSM748139	A
GSE30219_GSM748140	A
GSE30219_GSM748142	C
GSE30219_GSM748143	A
GSE30219_GSM748146	B
GSE30219_GSM748147	C
GSE30219_GSM748150	C
GSE30219_GSM748152	C
GSE30219_GSM748157	C
GSE30219_GSM748161	A
GSE30219_GSM748162	A
GSE30219_GSM748164	C
GSE30219_GSM748166	C
GSE30219_GSM748167	C
GSE30219_GSM748169	C
GSE30219_GSM748170	B
GSE30219_GSM748171	C
GSE30219_GSM748173	B
GSE30219_GSM748175	B
GSE30219_GSM748178	A
GSE30219_GSM748179	B
GSE30219_GSM748180	C
GSE30219_GSM748181	C
GSE30219_GSM748185	B
GSE30219_GSM748186	B
GSE30219_GSM748187	B
GSE30219_GSM748188	C
GSE30219_GSM748189	B
GSE30219_GSM748239	B
GSE30219_GSM748240	C
GSE30219_GSM748242	A
GSE30219_GSM748243	A
GSE30219_GSM748264	C
GSE30219_GSM748271	A
GSE30219_GSM748276	B
GSE30219_GSM748277	A
GSE30219_GSM748278	A
GSE30219_GSM748279	A
GSE30219_GSM1465989	A
GSE31210_GSM773540	A
GSE31210_GSM773541	B
GSE31210_GSM773542	B
GSE31210_GSM773543	A
GSE31210_GSM773544	A
GSE31210_GSM773545	A
GSE31210_GSM773546	B
GSE31210_GSM773547	A
GSE31210_GSM773548	A
GSE31210_GSM773549	A
GSE31210_GSM773550	A
GSE31210_GSM773551	A
GSE31210_GSM773552	B
GSE31210_GSM773553	C
GSE31210_GSM773554	C
GSE31210_GSM773555	B
GSE31210_GSM773556	C
GSE31210_GSM773557	A
GSE31210_GSM773558	A
GSE31210_GSM773559	B
GSE31210_GSM773560	B
GSE31210_GSM773561	A
GSE31210_GSM773562	B
GSE31210_GSM773563	B
GSE31210_GSM773564	C
GSE31210_GSM773565	B
GSE31210_GSM773566	A
GSE31210_GSM773567	C
GSE31210_GSM773568	B
GSE31210_GSM773569	C
GSE31210_GSM773570	A
GSE31210_GSM773571	B
GSE31210_GSM773572	B
GSE31210_GSM773573	B
GSE31210_GSM773574	B
GSE31210_GSM773575	A
GSE31210_GSM773576	A
GSE31210_GSM773577	A
GSE31210_GSM773578	B
GSE31210_GSM773579	A
GSE31210_GSM773580	A
GSE31210_GSM773581	B
GSE31210_GSM773582	A
GSE31210_GSM773583	A
GSE31210_GSM773584	A
GSE31210_GSM773585	B
GSE31210_GSM773586	B
GSE31210_GSM773587	A
GSE31210_GSM773588	A
GSE31210_GSM773589	B
GSE31210_GSM773590	B
GSE31210_GSM773591	B
GSE31210_GSM773592	B
GSE31210_GSM773593	B
GSE31210_GSM773594	C
GSE31210_GSM773595	C
GSE31210_GSM773596	C
GSE31210_GSM773597	A
GSE31210_GSM773598	A
GSE31210_GSM773599	A
GSE31210_GSM773600	B
GSE31210_GSM773601	B
GSE31210_GSM773602	C
GSE31210_GSM773603	B
GSE31210_GSM773604	B
GSE31210_GSM773605	A
GSE31210_GSM773606	C
GSE31210_GSM773607	C
GSE31210_GSM773608	C
GSE31210_GSM773609	C
GSE31210_GSM773610	A
GSE31210_GSM773611	C
GSE31210_GSM773612	B
GSE31210_GSM773613	B
GSE31210_GSM773614	A
GSE31210_GSM773615	A
GSE31210_GSM773616	B
GSE31210_GSM773617	A
GSE31210_GSM773618	C
GSE31210_GSM773619	A
GSE31210_GSM773620	C
GSE31210_GSM773621	B
GSE31210_GSM773622	C
GSE31210_GSM773623	C
GSE31210_GSM773624	C
GSE31210_GSM773625	C
GSE31210_GSM773626	B
GSE31210_GSM773627	A
GSE31210_GSM773628	B
GSE31210_GSM773629	C
GSE31210_GSM773630	B
GSE31210_GSM773631	C
GSE31210_GSM773632	A
GSE31210_GSM773633	B
GSE31210_GSM773634	C
GSE31210_GSM773635	C
GSE31210_GSM773636	C
GSE31210_GSM773637	A
GSE31210_GSM773638	C
GSE31210_GSM773639	A
GSE31210_GSM773640	A
GSE31210_GSM773641	C
GSE31210_GSM773642	A
GSE31210_GSM773643	A
GSE31210_GSM773644	A
GSE31210_GSM773645	B
GSE31210_GSM773646	A
GSE31210_GSM773647	A
GSE31210_GSM773648	B
GSE31210_GSM773649	B
GSE31210_GSM773650	C
GSE31210_GSM773651	B
GSE31210_GSM773652	C
GSE31210_GSM773653	C
GSE31210_GSM773654	A
GSE31210_GSM773655	A
GSE31210_GSM773656	A
GSE31210_GSM773657	C
GSE31210_GSM773658	B
GSE31210_GSM773659	B
GSE31210_GSM773660	A
GSE31210_GSM773661	A
GSE31210_GSM773662	C
GSE31210_GSM773663	C
GSE31210_GSM773664	C
GSE31210_GSM773665	B
GSE31210_GSM773666	A
GSE31210_GSM773667	A
GSE31210_GSM773668	C
GSE31210_GSM773669	A
GSE31210_GSM773670	C
GSE31210_GSM773671	C
GSE31210_GSM773672	B
GSE31210_GSM773673	B
GSE31210_GSM773674	B
GSE31210_GSM773675	A
GSE31210_GSM773676	A
GSE31210_GSM773677	B
GSE31210_GSM773678	A
GSE31210_GSM773679	B
GSE31210_GSM773680	C
GSE31210_GSM773681	C
GSE31210_GSM773682	C
GSE31210_GSM773683	B
GSE31210_GSM773684	C
GSE31210_GSM773685	C
GSE31210_GSM773686	C
GSE31210_GSM773687	C
GSE31210_GSM773688	A
GSE31210_GSM773689	C
GSE31210_GSM773690	C
GSE31210_GSM773691	C
GSE31210_GSM773692	C
GSE31210_GSM773693	C
GSE31210_GSM773694	C
GSE31210_GSM773695	C
GSE31210_GSM773696	C
GSE31210_GSM773697	B
GSE31210_GSM773698	C
GSE31210_GSM773699	C
GSE31210_GSM773700	A
GSE31210_GSM773701	C
GSE31210_GSM773702	A
GSE31210_GSM773703	B
GSE31210_GSM773704	C
GSE31210_GSM773705	C
GSE31210_GSM773706	C
GSE31210_GSM773707	C
GSE31210_GSM773708	C
GSE31210_GSM773709	A
GSE31210_GSM773710	C
GSE31210_GSM773711	C
GSE31210_GSM773712	C
GSE31210_GSM773713	A
GSE31210_GSM773714	C
GSE31210_GSM773715	A
GSE31210_GSM773716	B
GSE31210_GSM773717	A
GSE31210_GSM773718	C
GSE31210_GSM773719	C
GSE31210_GSM773720	A
GSE31210_GSM773721	C
GSE31210_GSM773722	A
GSE31210_GSM773723	B
GSE31210_GSM773724	A
GSE31210_GSM773725	C
GSE31210_GSM773726	A
GSE31210_GSM773727	A
GSE31210_GSM773728	C
GSE31210_GSM773729	C
GSE31210_GSM773730	A
GSE31210_GSM773731	C
GSE31210_GSM773732	C
GSE31210_GSM773733	C
GSE31210_GSM773734	C
GSE31210_GSM773735	C
GSE31210_GSM773736	C
GSE31210_GSM773737	A
GSE31210_GSM773738	C
GSE31210_GSM773739	C
GSE31210_GSM773740	A
GSE31210_GSM773741	A
GSE31210_GSM773742	B
GSE31210_GSM773743	C
GSE31210_GSM773744	C
GSE31210_GSM773745	B
GSE31210_GSM773746	C
GSE31210_GSM773747	C
GSE31210_GSM773748	C
GSE31210_GSM773749	B
GSE31210_GSM773750	C
GSE31210_GSM773751	C
GSE31210_GSM773752	C
GSE31210_GSM773753	C
GSE31210_GSM773754	C
GSE31210_GSM773755	C
GSE31210_GSM773756	A
GSE31210_GSM773757	C
GSE31210_GSM773758	C
GSE31210_GSM773759	C
GSE31210_GSM773760	C
GSE31210_GSM773761	C
GSE31210_GSM773762	C
GSE31210_GSM773763	C
GSE31210_GSM773764	A
GSE31210_GSM773765	C
GSE37745_GSM1019139	C
GSE37745_GSM1019140	C
GSE37745_GSM1019143	C
GSE37745_GSM1019144	C
GSE37745_GSM1019145	C
GSE37745_GSM1019147	C
GSE37745_GSM1019149	C
GSE37745_GSM1019150	A
GSE37745_GSM1019152	A
GSE37745_GSM1019153	A
GSE37745_GSM1019154	A
GSE37745_GSM1019158	B
GSE37745_GSM1019160	A
GSE37745_GSM1019162	B
GSE37745_GSM1019163	C
GSE37745_GSM1019164	C
GSE37745_GSM1019165	B
GSE37745_GSM1019166	C
GSE37745_GSM1019169	A
GSE37745_GSM1019170	A
GSE37745_GSM1019171	A
GSE37745_GSM1019174	A
GSE37745_GSM1019175	A
GSE37745_GSM1019176	C
GSE37745_GSM1019180	B
GSE37745_GSM1019181	A
GSE37745_GSM1019183	A
GSE37745_GSM1019185	A
GSE37745_GSM1019186	C
GSE37745_GSM1019187	A
GSE37745_GSM1019188	C
GSE37745_GSM1019190	C
GSE37745_GSM1019192	A
GSE37745_GSM1019194	A
GSE37745_GSM1019196	C
GSE37745_GSM1019197	A
GSE37745_GSM1019200	A
GSE37745_GSM1019203	B
GSE37745_GSM1019204	A
GSE37745_GSM1019205	A
GSE37745_GSM1019207	B
GSE37745_GSM1019210	B
GSE37745_GSM1019211	B
GSE37745_GSM1019213	B
GSE37745_GSM1019214	C
GSE37745_GSM1019216	A
GSE37745_GSM1019217	A
GSE37745_GSM1019218	B
GSE37745_GSM1019220	A
GSE37745_GSM1019224	A
GSE37745_GSM1019225	A
GSE37745_GSM1019228	A
GSE37745_GSM1019230	A
GSE37745_GSM1019234	A
GSE37745_GSM1019236	C
GSE37745_GSM1019239	A
GSE37745_GSM1019242	C
GSE37745_GSM1019243	A
GSE37745_GSM1019244	C
GSE37745_GSM1019247	B
GSE37745_GSM1019249	C
GSE37745_GSM1019253	A
GSE37745_GSM1019254	C
GSE37745_GSM1019256	A
GSE37745_GSM1019257	C
GSE37745_GSM1019258	C
GSE37745_GSM1019259	C
GSE37745_GSM1019260	B
GSE37745_GSM1019261	C
GSE37745_GSM1019264	A
GSE37745_GSM1019265	B
GSE37745_GSM1019268	C
GSE37745_GSM1019270	C
GSE37745_GSM1019272	A
GSE37745_GSM1019273	B
GSE37745_GSM1019274	B
GSE37745_GSM1019275	C
GSE37745_GSM1019283	A
GSE37745_GSM1019285	A
GSE37745_GSM1019286	A
GSE37745_GSM1019288	A
GSE37745_GSM1019289	C
GSE37745_GSM1019290	C
GSE37745_GSM1019292	C
GSE37745_GSM1019295	C
GSE37745_GSM1019298	B
GSE37745_GSM1019299	C
GSE37745_GSM1019300	A
GSE37745_GSM1019302	A
GSE37745_GSM1019303	B
GSE37745_GSM1019305	C
GSE37745_GSM1019308	A
GSE37745_GSM1019309	A
GSE37745_GSM1019310	C
GSE37745_GSM1019311	A
GSE37745_GSM1019312	A
GSE37745_GSM1019313	A
GSE37745_GSM1019314	B
GSE37745_GSM1019316	B
GSE37745_GSM1019318	C
GSE37745_GSM1019320	C
GSE37745_GSM1019321	B
GSE37745_GSM1019324	B
GSE37745_GSM1019328	B
GSE37745_GSM1019330	C
GSE37745_GSM1019332	B
GSE50081_GSM1213670	A
GSE50081_GSM1213671	C
GSE50081_GSM1213672	A
GSE50081_GSM1213673	B
GSE50081_GSM1213676	B
GSE50081_GSM1213677	B
GSE50081_GSM1213678	A
GSE50081_GSM1213679	A
GSE50081_GSM1213680	B
GSE50081_GSM1213681	A
GSE50081_GSM1213682	A
GSE50081_GSM1213683	C
GSE50081_GSM1213685	C
GSE50081_GSM1213686	A
GSE50081_GSM1213687	C
GSE50081_GSM1213688	C
GSE50081_GSM1213689	C
GSE50081_GSM1213690	C
GSE50081_GSM1213691	B
GSE50081_GSM1213692	C
GSE50081_GSM1213693	C
GSE50081_GSM1213694	A
GSE50081_GSM1213695	B
GSE50081_GSM1213696	C
GSE50081_GSM1213697	C
GSE50081_GSM1213698	B
GSE50081_GSM1213699	C
GSE50081_GSM1213700	B
GSE50081_GSM1213702	A
GSE50081_GSM1213703	C
GSE50081_GSM1213704	A
GSE50081_GSM1213707	A
GSE50081_GSM1213710	B
GSE50081_GSM1213715	B
GSE50081_GSM1213716	B
GSE50081_GSM1213717	B
GSE50081_GSM1213720	A
GSE50081_GSM1213722	B
GSE50081_GSM1213723	A
GSE50081_GSM1213724	C
GSE50081_GSM1213726	A
GSE50081_GSM1213727	A
GSE50081_GSM1213728	A
GSE50081_GSM1213730	A
GSE50081_GSM1213733	A
GSE50081_GSM1213734	C
GSE50081_GSM1213735	B
GSE50081_GSM1213736	B
GSE50081_GSM1213737	A
GSE50081_GSM1213738	C
GSE50081_GSM1213739	A
GSE50081_GSM1213740	C
GSE50081_GSM1213741	C
GSE50081_GSM1213742	A
GSE50081_GSM1213743	C
GSE50081_GSM1213746	C
GSE50081_GSM1213747	C
GSE50081_GSM1213749	A
GSE50081_GSM1213750	A
GSE50081_GSM1213751	C
GSE50081_GSM1213752	C
GSE50081_GSM1213753	C
GSE50081_GSM1213754	A
GSE50081_GSM1213756	C
GSE50081_GSM1213757	A
GSE50081_GSM1213758	C
GSE50081_GSM1213759	A
GSE50081_GSM1213760	A
GSE50081_GSM1213761	C
GSE50081_GSM1213762	B
GSE50081_GSM1213763	A
GSE50081_GSM1213764	A
GSE50081_GSM1213768	C
GSE50081_GSM1213769	C
GSE50081_GSM1213770	A
GSE50081_GSM1213773	C
GSE50081_GSM1213774	B
GSE50081_GSM1213775	A
GSE50081_GSM1213777	A
GSE50081_GSM1213779	C
GSE50081_GSM1213780	A
GSE50081_GSM1213781	A
GSE50081_GSM1213782	A
GSE50081_GSM1213783	A
GSE50081_GSM1213784	C
GSE50081_GSM1213785	C
GSE50081_GSM1213787	A
GSE50081_GSM1213788	A
GSE50081_GSM1213792	A
GSE50081_GSM1213793	B
GSE50081_GSM1213794	C
GSE50081_GSM1213795	C
GSE50081_GSM1213797	C
GSE50081_GSM1213798	C
GSE50081_GSM1213800	A
GSE50081_GSM1213801	B
GSE50081_GSM1213803	B
GSE50081_GSM1213804	A
GSE50081_GSM1213805	B
GSE50081_GSM1213806	B
GSE50081_GSM1213807	A
GSE50081_GSM1213808	C
GSE50081_GSM1213809	C
GSE50081_GSM1213810	A
GSE50081_GSM1213811	A
GSE50081_GSM1213812	B
GSE50081_GSM1213814	A
GSE50081_GSM1213816	B
GSE50081_GSM1213818	C
GSE50081_GSM1213819	B
GSE50081_GSM1213820	A
GSE50081_GSM1213824	B
GSE50081_GSM1213825	C
GSE50081_GSM1213826	B
GSE50081_GSM1213827	A
GSE50081_GSM1213831	C
GSE50081_GSM1213833	C
GSE50081_GSM1213834	A
GSE50081_GSM1213836	C
GSE50081_GSM1213837	B
GSE50081_GSM1213840	B
GSE50081_GSM1213844	A
GSE50081_GSM1213845	A
GSE50081_GSM1213846	A
GSE50081_GSM1213847	C
GSE50081_GSM1213848	B
GSE50081_GSM1213849	A
